# Supplementary material for: Short-Term Thermal Stress Affects Immune Cell Features in the Sea Urchin Paracentrotus lividus
Source: MDPI journal article supplement (doi:10.3390/ani13121954), 2023-06-11
Supplement: s1 [file s1]

## Supplemental materials

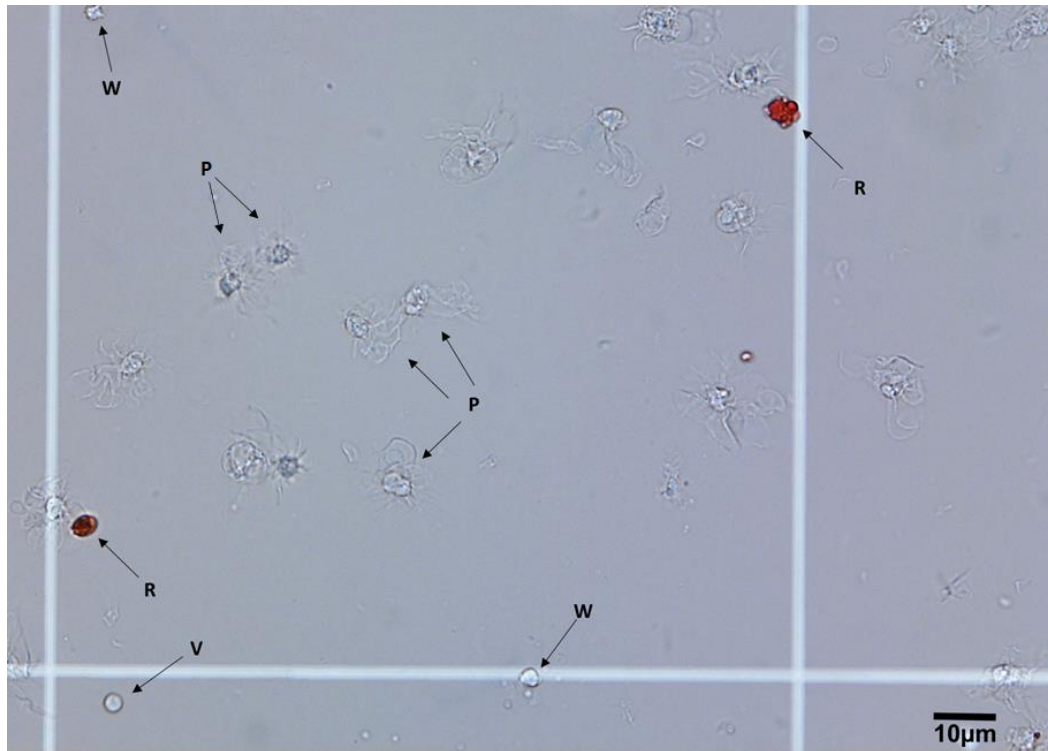

**Figure S1.** *Paracentrotus lividus* coelomocytes in the count chamber. Petaloid and philopodial phagocytes (P), red amoebocytes (R), white amoebocytes (W) and vibratile cells (V) are indicated with arrows.
